# Supplementary material
Source: publisher site journal article supplement (https://www.spandidos-publications.com/4669/downloadSupplementary)
Supplement: Supplementary file 1 [file downloadSupplementary]

## Data S1

### Literature review

*Search strategy.* The PubMed/MEDLINE, Embase and Cochrane electronic databases were searched for studies on co-occurrence of craniopharyngioma and intracranial aneurysm, and endoscopic endonasal approach to deal with aneurysm or craniopharyngioma. The search did not have a start date limit and was last updated on March 30, 2022. The following search terms were used in each database: Craniopharyngioma, aneurysm, endoscopic endonasal approach, craniopharyngioma, aneurysm, craniopharyngioma, endoscopic endonasal approach, aneurysm and endoscopic endonasal approach.

*Selection criteria.* The inclusion criteria were as follows: i) Topic co-occurrence of craniopharyngioma and intracranial aneurysm or craniopharyngioma resection by endoscopic endonasal approach or aneurysm clipping by endoscopic endonasal approach; and ii) English language. Due to the comprehensive nature of the systematic review and the large volume of articles obtained from the search, it was not possible to include articles written in languages other than English. Articles published ahead of print and any study design were considered. Reference lists of the selected articles were also screened to identify additional studies.
